# Supplementary material for: Foliar Application of dsRNA to Induce Gene Silencing in Emerald Ash Borer: Systemic Distribution, Persistence, and Bioactivity
Source: MDPI journal article supplement (doi:10.3390/f14091853), 2023-09-12
Supplement: s1 [file s1]

**Supplementary Table S1.** Primer sequences for dsRNA synthesis and PCR amplification

| Gene                                      | Primer Sequence |                        | Amplicon length (bp) |
|-------------------------------------------|-----------------|------------------------|----------------------|
| <i>EAB-hsp (PCR)</i>                      | F               | GTTACGAGCCAGGGTGAAAA   | 468                  |
|                                           | R               | CTTTTGAACGGCACGGTTAT   |                      |
| <i>EAB-hsp (nested PCR)</i>               | F               | AAAGTTACCCATGCTGTTGTA  | 250                  |
|                                           | R               | TAGCCACCACCTCAAAGA     |                      |
| <i>EAB-hsp (qPCR)</i>                     | F               | GACAAAGGAACGGGAAACAA   | 97                   |
|                                           | R               | TCTCGGCATCCCTTATCATC   |                      |
| <i>EAB-<math>\beta</math>-tub (qPCR)</i>  | F               | CTCCGTGATATGCTCCAGTG   | 105                  |
|                                           | R               | TCGTACATATTCAAGCTGGCC  |                      |
| <i>EAB-tefl<math>\alpha</math> (qPCR)</i> | F               | CATTGAAACCTACGTTGTCGC  | 130                  |
|                                           | R               | ACTGGAGTGCTTAAACCTGG   |                      |
| <i>ash-efl<math>\beta</math></i>          | F               | GTCTACAGCAGGAGGAGTTG   | 116                  |
|                                           | R               | ACCACATTGAAGCACTATTGAG |                      |
